# Supplementary material
Source: Springer Nature journal article supplement (https://www.springermedizin.de/resource/supplementary/12884_2012_677_MOESM1_ESM.pdf/9458450)

Colonization

Rural Geography  
Economic resources  
Birthing resources

Power,  
Choice,  
Control

Birthing  
expectations

**Stresses on  
birthing and  
birth  
outcomes and  
experiences**

Decolonization:

Cultural revitalization, reclamation, self  
determination

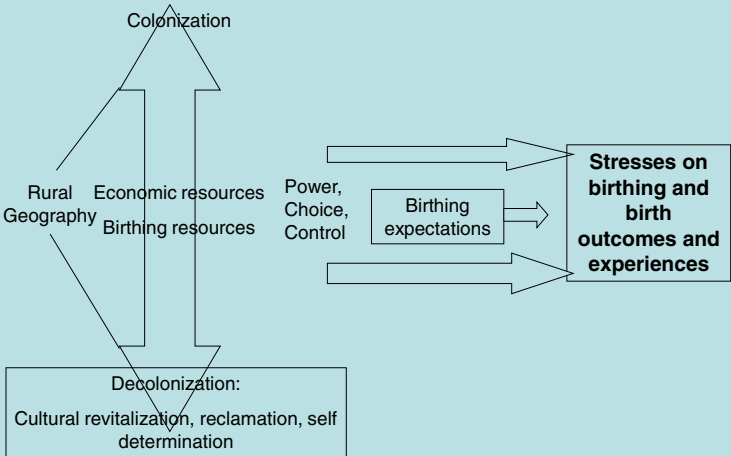

Supplement: MOESM1 [file 9458450]
